# Supplementary material
Source: PubMed Central journal article supplement (PMC7610231)
Supplement: mp0c00668_si_001.pdf [file mp0c00668_si_001.pdf]

# Influence of bile composition on membrane incorporation of transient permeability enhancers

**Authors:** Shakhawath Hossain<sup>1,2</sup>, Paul Joyce<sup>3</sup>, Albin Parrow<sup>1</sup>, Silver Jõemetsa<sup>3</sup>, Fredrik Höök<sup>3</sup>, Per Larsson<sup>1,2</sup>, Christel A. Bergström<sup>1,2,\*</sup>

<sup>1</sup>Dept of Pharmacy, Uppsala University, Husargatan 3, 751 23 Uppsala, Sweden

<sup>2</sup>The Swedish Drug delivery Forum (SDDF), Uppsala University, Husargatan 3, 751 23 Uppsala, Sweden

<sup>3</sup>Division of Biological Physics, Chalmers University of Technology, Gothenburg, Sweden

\* Corresponding Author

## Table of contents:

| List of Figures                                                                                                                            | Page number |
|--------------------------------------------------------------------------------------------------------------------------------------------|-------------|
| Supplementary Figure 1: Simulation system used to study the interaction of permeability enhancers (PEs), bile components and membrane.     | 2           |
| Supplementary Figure 2: Variation of free caprate monomers during the simulation                                                           | 3           |
| Supplementary Figure 3: Distribution of the micelle sizes from the simulations of different intestinal fluids with the addition of caprate | 4           |
| Supplementary Figure 4: (A) Coarse-grained representation of the caprate and SNAC molecules. (B) Representation of $d$ and $\theta$        | 5           |

| List of Tables                                                                                                                                        | Page number |
|-------------------------------------------------------------------------------------------------------------------------------------------------------|-------------|
| Supplementary Table 1: Composition details of the four different micelles in the US simulations.                                                      | 6           |
| Supplementary Table 2: QCM-D experiments using different combinations of fasted and fed state simulated intestinal fluids and permeability enhancers. | 6           |
| Supplementary Table 3: Description of the micelle sizes from the simulations of different intestinal fluids with the addition of caprate              | 7           |

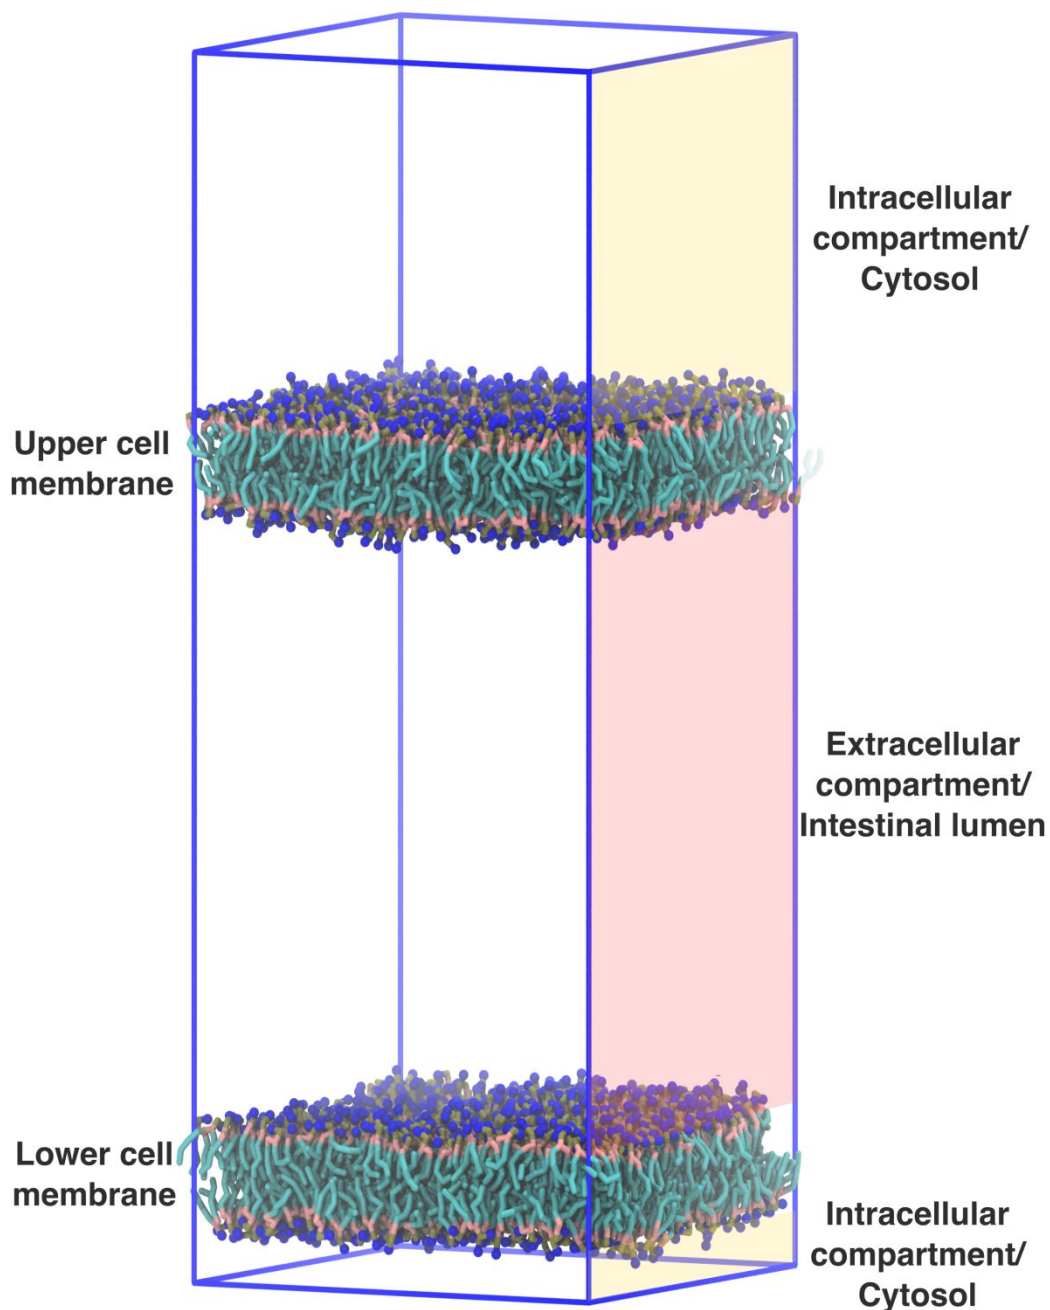

Supplementary Figure 1: Simulation system used to study the interaction of permeability enhancers (PEs), bile components and membrane. Different PE and bile components were placed in between POPC membranes as indicated by extracellular compartment. Such systems were used so that PEs and bile components can only interact with one side of the membrane. Intracellular compartment was used to restrict the interaction between the membranes itself.

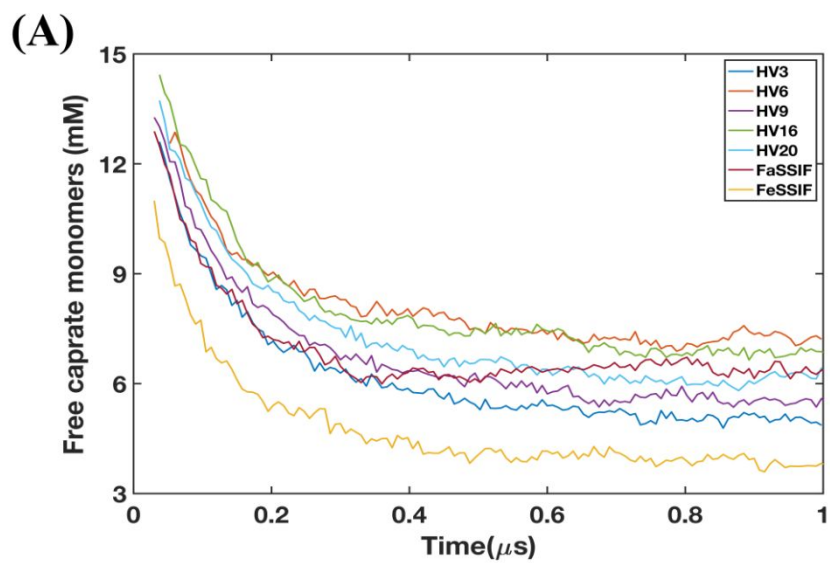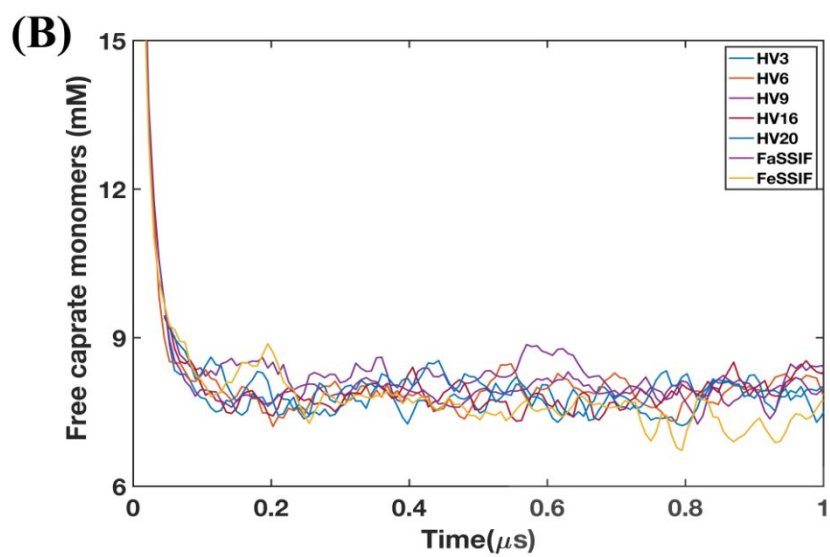

Supplementary Figure 2: Variation of free caprate monomers during the simulation with the addition of (A) 20 mM and (B) 100 mM of caprate.

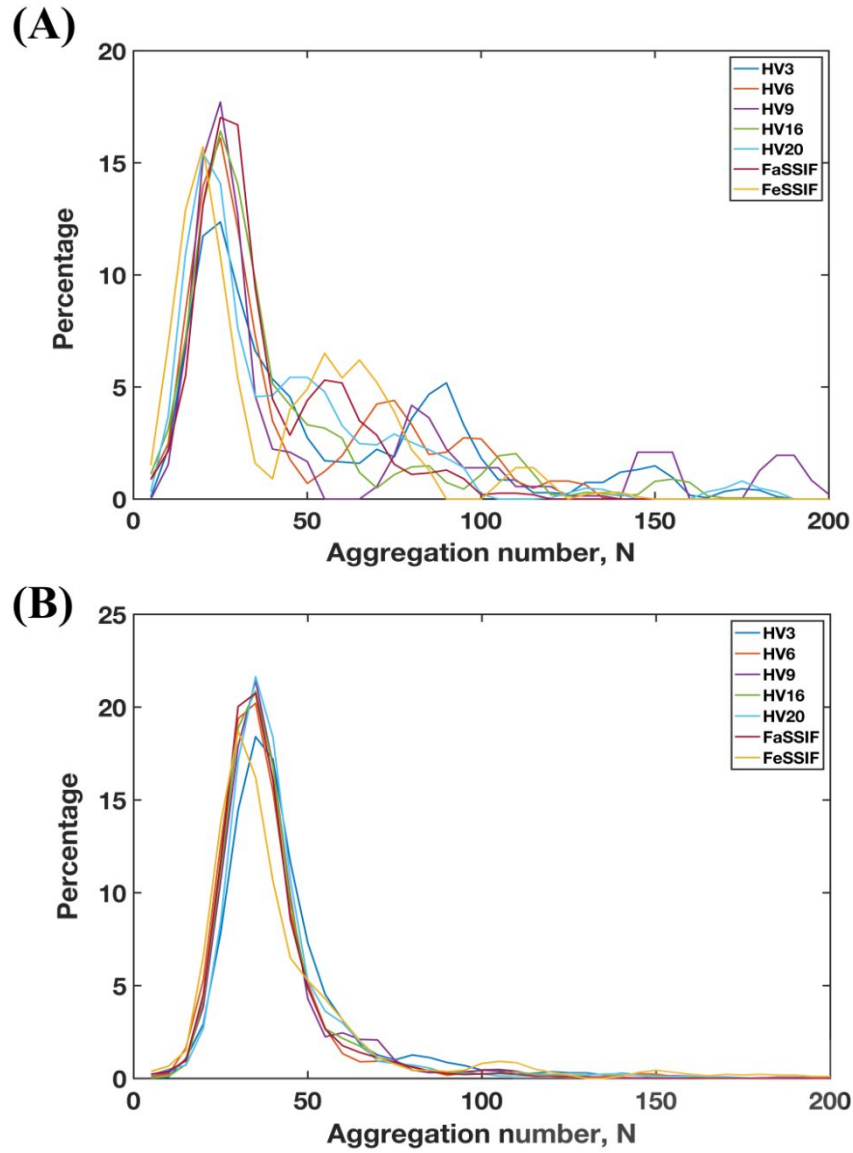

Supplementary Figure 3: Distribution of the micelle sizes from the simulations of different intestinal fluids with the addition of (A) 20 mM and (B) 100 mM of caprate.

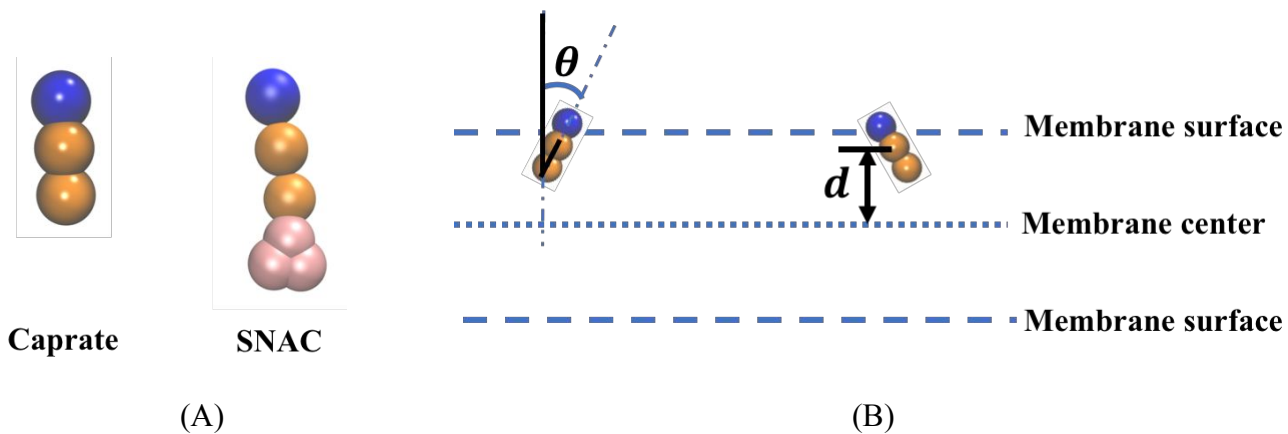

Supplementary Figure 4: (A) Coarse-grained representation of the caprate and SNAC molecules. The blue, orange and pink beads represent headgroup, fatty acid chain and salicylamide region, respectively. (B) Representation of  $d$ , which is the distance between the membrane center and the center of mass of the caprate and SNAC fatty acid chain in the membrane normal direction.  $\theta$  represents the angle between membrane normal and the vector from two consecutive beads of the fatty acid chain.

Supplementary Table 1: Composition details of the four different micelles in the US simulations. Note that, in the first column, the names of the micelles are the same as presented in Figure 8A.

| Micelle       | Composition                            |
|---------------|----------------------------------------|
| OA            | 25 OA and 1 caprate molecules          |
| BS            | 10 NaTC and 1 caprate molecules        |
| Mixed (BS+PL) | 14 NaTC, 4 POPC and 1 caprate molecule |
| C10           | 22 caprate molecules                   |

The following abbreviations are used: Phospholipids (PL), 1-palmitoyl-2-oleoyl-sn-glycero-3-phosphocholine (POPC), oleate (OA), bile salts (BS), sodium taurocholate (NaTC), C10 (caprate)

Supplementary Table 2: QCM-D experiments using different combinations of fasted and fed state simulated intestinal fluids and permeability enhancers.

| Experiment | Combination of Intestinal fluid and PE added in Step (iii), see Section 2.3 |
|------------|-----------------------------------------------------------------------------|
| A          | FaSSIF                                                                      |
| B          | FeSSIF                                                                      |
| C          | FaSSIF with 100 mM of caprylate                                             |
| D          | FeSSIF with 100 mM of caprylate                                             |
| E          | FaSSIF with 100 mM of caprate                                               |
| F          | FeSSIF with 100 mM of caprate                                               |
| G          | FaSSIF with 100 mM of SNAC                                                  |
| H          | FeSSIF with 100 mM of SNAC                                                  |

Supplementary Table 3: Description of the micelle sizes from the simulations of different intestinal fluids with the addition of caprate

| Intestinal fluid | With addition of 20 mM Caprate       |                                      | With addition of 100 mM Caprate      |                                      |
|------------------|--------------------------------------|--------------------------------------|--------------------------------------|--------------------------------------|
|                  | Aggregate size<br>(in nm)<br>Max/Min | Aggregate size<br>(in nm)<br>Average | Aggregate size<br>(in nm)<br>Max/Min | Aggregate size<br>(in nm)<br>Average |
| HV3              | 10.7/2.8                             | 4.9                                  | 11.8/2.6                             | 5.1                                  |
| HV6              | 7.3/2.7                              | 3.8                                  | 7.9/2.3                              | 4.3                                  |
| HV9              | 11.3/2.6                             | 5.1                                  | 11.5/2.6                             | 5.1                                  |
| HV16             | 7.4/2.4                              | 3.6                                  | 9.4/2.5                              | 4.5                                  |
| HV20             | 10.4/2.7                             | 3.9                                  | 10.1/2.4                             | 4.9                                  |
| FaSSIF           | 7.9/2.8                              | 3.8                                  | 9.5/2.5                              | 4.5                                  |
| FeSSIF           | 11.2/3.1                             | 5.2                                  | 11.6/2.9                             | 4.9                                  |
